# Supplementary material
Source: publisher site journal article supplement (https://www.dovepress.com/article/400908)
Supplement: Supplementary file 1 [file get_supplementary_file.php]

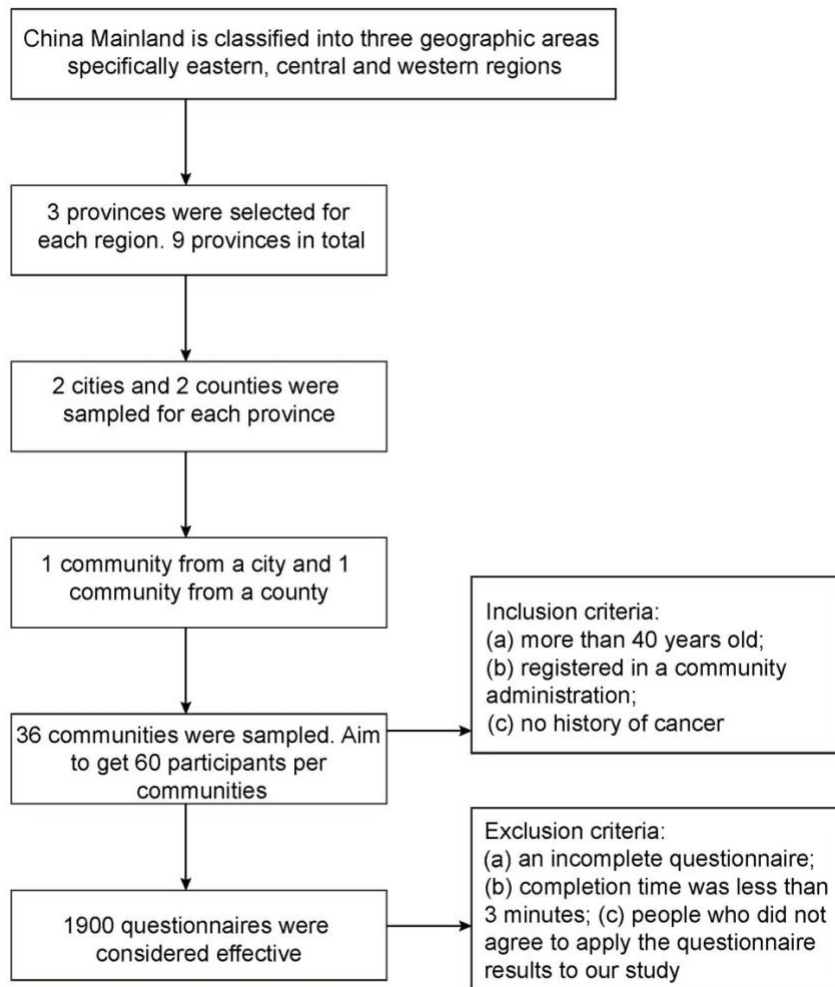

**Supplementary Figure 1:** Flow diagram showing the cluster sampling approach and participants' selection.

## Questionnaires about the recognition of gastric cancer screening and acceptance of gastroscopy

You are invited to participate in a nationwide study on the acceptance of gastroscopy for gastric cancer screening in China by filling in questionnaires.

If you join in this study, information that identifies you will not be involved in the analysis of the data, the publication of the research, or any public release. All questionnaires will be managed by the data committee of this research group and will not be leaked.

If you decide not to participate, it will not affect your social relationships.

If there is anything you do not understand or if you want more information about this study, please feel free to ask the investigator.

1. What is your gender? \*

Male

Female

2. What is your age?

---

3. Which city do you live?

---

4. What is your education level? \*

Uneducated or elementary

High school

College or above

5. What is the range of your annual family income? \*

Below ¥20,000

¥20,000-¥50,000

¥50,000-¥100,000

¥100,000-¥200,000

More than ¥200,000





|                                                |                       |                       |                       |                       |                       |                       |                       |
|------------------------------------------------|-----------------------|-----------------------|-----------------------|-----------------------|-----------------------|-----------------------|-----------------------|
| or DNA test                                    |                       |                       |                       |                       |                       |                       |                       |
| Serum gastric function                         | <input type="radio"/> |
| Tumor markers                                  | <input type="radio"/> |
| Capsule endoscopy                              | <input type="radio"/> |
| 3                                              |                       |                       |                       |                       |                       |                       |                       |
| Helicobacter pylori test                       | <input type="radio"/> |
| Conflagration                                  | <input type="radio"/> |
| Physical examination                           | <input type="radio"/> |
| Gastric carcinoma                              | <input type="radio"/> |
| Colorectal cancer                              | <input type="radio"/> |
| Public health emergency (as COVID-19 epidemic) | <input type="radio"/> |

8. For the following events, please choose a score according to your first feeling about the extent of **benefit**. From 1 to 7 present form “Not at all” to “Very much”. “Benefit” is defined as something or a condition brings advantages or profit.\*

|  |                |   |   |   |   |   |               |
|--|----------------|---|---|---|---|---|---------------|
|  | 1 (Not at all) | 2 | 3 | 4 | 5 | 6 | 7 (Very much) |
|--|----------------|---|---|---|---|---|---------------|





|                                                 |                       |                       |                       |                       |                       |                       |                       |
|-------------------------------------------------|-----------------------|-----------------------|-----------------------|-----------------------|-----------------------|-----------------------|-----------------------|
| Tumor markers                                   | <input type="radio"/> |
| Capsule endoscopy                               | <input type="radio"/> |
| 3                                               |                       |                       |                       |                       |                       |                       |                       |
| Helicobacter pylori test                        | <input type="radio"/> |
| Conflagration                                   | <input type="radio"/> |
| Physical examination                            | <input type="radio"/> |
| Gastric carcinoma                               | <input type="radio"/> |
| Colorectal cancer                               | <input type="radio"/> |
| Public health emergency (as COVID-19 epidemic). | <input type="radio"/> |

10. Are you familiar with “early gastrointestinal cancer screening” \*

Not at all

A little impression

Commonly

More than common

Very much



11. Will you accept gastroscopy if doctors inform the need? \*

Yes

No

12. Do you have these worries about gastroscopy? (choose 1-7 answers) \*

Fear of pain or uncomfortable

Psychological burden (fear of medicine, such as possible bad results or families' worries)

I know I am healthy while the doctor worried too much

It is troublesome going to the hospital

Do not know how to do or the reason to do gastroscopy

High expense of gastroscopy

Reveal privacy

I do not have any worries listed above

13. Do you have these situations? \*

Age is older than 40 years

Helicobacter pylori infection

Used to have Precancerous lesions of the stomach, such as chronic atrophic gastritis, gastric ulcer, gastric polyps, residual stomach post operation, hypertrophic gastritis, or pernicious anemia

One of my parents, children, brothers or sisters had gastric cancer

Risk behaviors of gastric cancer, like high salt diet, smoking or heavy drinking.

I do not have any situations listed above
